# Supplementary material
Source: publisher site journal article supplement (https://www.dovepress.com/article/398218)
Supplement: Supplementary file 1 [file get_supplementary_file.php]

**Table S1** The 100 top-cited papers in midwives. (Supplementary Materials)

| Rank | Title | First author | Source | IF | Average citations per year | Country | Publication year |
| --- | --- | --- | --- | --- | --- | --- | --- |
| 1 | midwifery - alternative care for pregnancy and childbirth27 | GARFIELD, E | CURRENT CONTENTS | 0.24 | 14.67 | USA | 1988 |
| 2 | midwifery and quality care: findings from a new evidence-informed framework for maternal and newborn care 28 | Renfrew, MJ | LANCET | 60.392 | 64.71 | Scotland | 2014 |
| 3 | improvement of maternal and newborn health through midwifery 29 | ten Hoope-Bender, P | LANCET | 60.392 | 30.00 | Spain | 2014 |
| 4 | outcomes of planned home birth with registered midwife versus planned hospital birth with midwife or physician30 | Janssen, PA | CANADIAN MEDICAL ASSOCIATION JOURNAL | 7.744 | 16.50 | Canada | 2009 |
| 5 | outcomes of planned home births with certified professional midwives: large prospective study in north america31 | Johnson, KC | BRITISH MEDICAL JOURNAL | 30.223 | 9.94 | Canada | 2005 |
| 6 | caseload midwifery care versus standard maternity care for women of any risk: m@ngo, a randomised controlled trial32 | Tracy, SK | LANCET | 60.392 | 19.38 | Australia | 2013 |
| 7 | enhancing the resilience of nurses and midwives: pilot of a mindfulness-based program for increased health, sense of coherence and decreased depression, anxiety and stress33 | Foureur, M | CONTEMPORARY NURSE | 0.925 | 18.50 | Australia | 2013 |
| 8 | effects of continuity of care by a primary midwife (caseload midwifery) on caesarean section rates in women of low obstetric risk: the cosmos randomised controlled trial34 | McLachlan, HL | BJOG-AN INTERNATIONAL JOURNAL OF OBSTETRICS AND GYNAECOLOGY | 4.663 | 16.22 | Australia | 2012 |
| 9 | cosmopolitical obstetrics - some insights from the training of traditional midwives35 | JORDAN, B | SOCIAL SCIENCE & MEDICINE | 3.616 | 4.50 | USA | 1989 |
| 10 | conflicting ideologies as a source of emotion work in midwifery36 | Hunter, B | MIDWIFERY | 1.778 | 8.24 | Wales | 2004 |
| 11 | outcomes associated with planned home and planned hospital births in low-risk women attended by midwives in ontario, canada, 2003-2006: a retrospective cohort study37 | Hutton, EK | BIRTH-ISSUES IN PERINATAL CARE | 2.705 | 11.58 | Canada | 2009 |
| 12 | the projected effect of scaling up midwifery38 | Homer, CSE | LANCET | 60.392 | 19.71 | Australia | 2014 |
| 13 | randomised, controlled trial of efficacy of midwife-managed care39 | Turnbull, D | LANCET | 60.392 | 5.52 | SCOTLAND | 1996 |
| 14 | change in knowledge of midwives and obstetricians following obstetric emergency training: a randomised controlled trial of local hospital, simulation centre and teamwork training40 | Crofts, JF | BJOG-AN INTERNATIONAL JOURNAL OF OBSTETRICS AND GYNAECOLOGY | 4.663 | 8.86 | England | 2007 |
| 15 | outcomes of planned home births versus planned hospital births after regulation of midwifery in british columbia41 | Janssen, PA | CANADIAN MEDICAL ASSOCIATION JOURNAL | 7.744 | 6.21 | Canada | 2002 |
| 16 | outcome of planned home and planned hospital births in low risk pregnancies: prospective study in midwifery practices in the netherlands42 | Wiegers, TA | BRITISH MEDICAL JOURNAL | 30.223 | 4.68 | AUSTRALIA | 1996 |
| 17 | randomised controlled trial of midwife led debriefing to reduce maternal depression after operative childbirth43 | Small, R | BRITISH MEDICAL JOURNAL | 30.223 | 5.48 | Australia | 2000 |
| 18 | country experience with strengthening of health systems and deployment of midwives in countries with high maternal mortality44 | Van Lerberghe, W | LANCET | 60.392 | 16.14 | Indonesia | 2014 |
| 19 | midwife managed delivery unit - a randomized controlled comparison with consultant led care45 | HUNDLEY, VA | BRITISH MEDICAL JOURNAL | 30.223 | 4.19 | SCOTLAND | 1994 |
| 20 | a model of exemplary midwifery practice: results of a delphi study46 | Kennedy, HP | JOURNAL OF MIDWIFERY & WOMENS HEALTH | 1.742 | 5.19 | USA | 2000 |
| 21 | can midwives reduce postpartum psychological morbidity? a randomized trial47 | Lavender, T | BIRTH-ISSUES IN PERINATAL CARE | 2.705 | 4.39 | England | 1998 |
| 22 | women's experience of the encounter with the midwife during childbirth48 | Berg, M | MIDWIFERY | 1.778 | 3.88 | SWEDEN | 1996 |
| 23 | midwifery care measures in the second stage of labor and reduction of genital tract trauma at birth: a randomized trial49 | Albers, LL | JOURNAL OF MIDWIFERY & WOMENS HEALTH | 1.742 | 6.00 | USA | 2005 |
| 24 | 'rage against the machine?': nurses' and midwives' experiences of using computerized patient information systems for clinical information50 | Darbyshire, P | JOURNAL OF CLINICAL NURSING | 1.972 | 5.65 | Australia | 2004 |
| 25 | randomized controlled trial of a midwife-delivered brief smoking cessation intervention in pregnancy51 | Hajek, P | ADDICTION | 6.343 | 4.80 | England | 2001 |
| 26 | midwifery care, social and medical risk factors, and birth outcomes in the usa52 | MacDorman, MF | JOURNAL OF EPIDEMIOLOGY AND COMMUNITY HEALTH | 3.342 | 4.13 | USA | 1998 |
| 27 | outcomes of care for 16,924 planned home births in the united states: the midwives alliance of north america statistics project, 2004 to 200953 | Cheyney, M | JOURNAL OF MIDWIFERY & WOMENS HEALTH | 1.742 | 13.43 | USA | 2014 |
| 28 | complementary and alternative medicine in pregnancy: a survey of north carolina certified nurse-midwives54 | Allaire, AD | OBSTETRICS AND GYNECOLOGY | 5.524 | 4.48 | USA | 2000 |
| 29 | a randomized controlled trial of a psycho-education intervention by midwives in reducing childbirth fear in pregnant women55 | Toohill, J | BIRTH-ISSUES IN PERINATAL CARE | 2.705 | 13.14 | Australia | 2014 |
| 30 | an evaluation of midwives' counseling of pregnant women in fear of childbirth56 | Ryding, EL | ACTA OBSTETRICIA ET GYNECOLOGICA SCANDINAVICA | 2.77 | 4.83 | Sweden | 2003 |
| 31 | does team midwife care increase satisfaction with antenatal, intrapartum, and postpartum care? a randomized controlled trial57 | Waldenstrom, U | BIRTH-ISSUES IN PERINATAL CARE | 2.705 | 4.14 | Sweden | 2000 |
| 32 | an emerging model of maternity care: smartphone, midwife, doctor?58 | Tripp, N | WOMEN AND BIRTH | 2.308 | 12.14 | Australia | 2014 |
| 33 | a national survey of herbal preparation use by nurse-midwives for labor stimulation - review of the literature and recommendations for practice59 | McFarlin, BL | JOURNAL OF NURSE-MIDWIFERY | 1.15 | 3.86 | USA | 1999 |
| 34 | what prevents quality midwifery care? a systematic mapping of barriers in low and middle income countries from the provider perspective60 | Filby, A | PLOS ONE | 2.74 | 16.80 | England | 2016 |
| 35 | continuity of care by a midwife team versus routine care during pregnancy and birth - a randomized trial61 | ROWLEY, MJ | MEDICAL JOURNAL OF AUSTRALIA | 6.112 | 3.23 | Australia | 1995 |
| 36 | emotion work and boundary maintenance in hospital-based midwifery62 | Hunter, B | MIDWIFERY | 1.778 | 5.13 | Wales | 2005 |
| 37 | factors that may influence midwives work-related stress and burnout63 | Mollart, L | WOMEN AND BIRTH | 2.308 | 10.00 | Australia | 2013 |
| 38 | evaluation of 280,000 cases in dutch midwifery practices: a descriptive study64 | Amelink-Verburg, MP | BJOG-AN INTERNATIONAL JOURNAL OF OBSTETRICS AND GYNAECOLOGY | 4.663 | 6.15 | Netherlands | 2008 |
| 39 | central concepts in the midwife-woman relationship65 | Lundgren, I | SCANDINAVIAN JOURNAL OF CARING SCIENCES | 2.34 | 5.71 | Sweden | 2007 |
| 40 | the validity and reliability of methods to assess the competence to practise of pre-registration nursing and midwifery students66 | Norman, IJ | INTERNATIONAL JOURNAL OF NURSING STUDIES | 3.783 | 4.21 | England | 2002 |
| 41 | what determines quality in maternity care? comparing the perceptions of childbearing women and midwives67 | Proctor, S | BIRTH-ISSUES IN PERINATAL CARE | 2.705 | 3.48 | England | 1998 |
| 42 | shift work, nitrous oxide exposure and subfertility among swedish midwives68 | Ahlborg, G | INTERNATIONAL JOURNAL OF EPIDEMIOLOGY | 7.707 | 3.16 | SWEDEN | 1996 |
| 43 | They’re not the same as us - midwives stereo-types of south asian descent maternity patients69 | BOWLER, I | SOCIOLOGY OF HEALTH & ILLNESS | 3.041 | 2.79 | WALES | 1993 |
| 44 | safety of aspiration abortion performed by nurse practitioners, certified nurse midwives, and physician assistants under a california legal waiver70 | Weitz, TA | AMERICAN JOURNAL OF PUBLIC HEALTH | 6.464 | 9.63 | USA | 2013 |
| 45 | a randomized trial of nurse-midwifery prenatal-care to reduce low-birth-weight71 | HEINS, HC | OBSTETRICS AND GYNECOLOGY | 5.524 | 2.48 | WHO | 1990 |
| 46 | mapping integration of midwives across the united states: impact on access, equity, and outcomes72 | Vedam, S | PLOS ONE | 2.74 | 25.33 | Canada | 2018 |
| 47 | association of rotating night shift work with bmi and abdominal obesity among nurses and midwives73 | Peplonska, B | PLOS ONE | 2.74 | 12.67 | Poland | 2015 |
| 48 | the culture of midwifery in the national health service in england74 | Kirkham, M | JOURNAL OF ADVANCED NURSING | 2.561 | 3.45 | England | 1999 |
| 49 | a critical ethnographic study of encounters between midwives and breast-feeding women in postnatal wards in england75 | Dykes, F | MIDWIFERY | 1.778 | 4.69 | England | 2005 |
| 50 | satisfaction with team midwifery care for low- and high-risk women: a randomized controlled trial76 | Biro, MA | BIRTH-ISSUES IN PERINATAL CARE | 2.705 | 4.17 | Australia | 2003 |
| 51 | outcomes of intended home births in nurse-midwifery practice: a prospective descriptive study77 | Murphy, PA | OBSTETRICS AND GYNECOLOGY | 5.524 | 3.26 | USA | 1998 |
| 52 | state practice environments and the supply of physician assistants, nurse practitioners, and certified nurse-midwives78 | SEKSCENSKI, ES | NEW ENGLAND JOURNAL OF MEDICINE | 74.699 | 2.78 | USA | 1994 |
| 53 | a midwifery model of woman-centred childbirth care - in swedish and icelandic settings79 | Berg, M | SEXUAL & REPRODUCTIVE HEALTHCARE | 2.024 | 8.22 | Sweden | 2012 |
| 54 | maternal obesity support services: a qualitative study of the perspectives of women and midwives80 | Furness, PJ | BMC PREGNANCY AND CHILDBIRTH | 2.239 | 7.40 | England | 2011 |
| 55 | a randomized, controlled trial of nurse-midwifery care81 | Harvey, S | BIRTH-ISSUES IN PERINATAL CARE | 2.705 | 2.88 | Canada | 1996 |
| 56 | prevalence of burnout, depression, anxiety and stress in australian midwives: a cross-sectional survey82 | Creedy, DK | BMC PREGNANCY AND CHILDBIRTH | 2.239 | 17.50 | Australia | 2017 |
| 57 | the landscape of caring for women: a narrative study of midwifery practice83 | Kennedy, HP | JOURNAL OF MIDWIFERY & WOMENS HEALTH | 1.742 | 4.12 | USA | 2004 |
| 58 | 'not waving but drowning': a study of the experiences and concerns of midwives and other health professionals caring for obese childbearing women84 | Schmied, VA | MIDWIFERY | 1.778 | 6.90 | Australia | 2011 |
| 59 | what helps and hinders midwives in engaging with pregnant women about stopping smoking? a cross-sectional survey of perceived implementation difficulties among midwives in the north east of england85 | Beenstock, J | IMPLEMENTATION SCIENCE | 5.531 | 7.56 | England | 2012 |
| 60 | a work-based educational intervention to support the development of personal resilience in nurses and midwives86 | McDonald, G | NURSE EDUCATION TODAY | 2.49 | 7.56 | Australia | 2012 |
| 61 | women's experiences of continuity of midwifery care in a randomised controlled trial in australia87 | Homer, CSE | MIDWIFERY | 1.778 | 3.58 | Australia | 2002 |
| 62 | supportive nurse-midwife care is associated with a reduced incidence of cesarean-section88 | BUTLER, J | AMERICAN JOURNAL OF OBSTETRICS AND GYNECOLOGY | 6.502 | 2.43 | USA | 1993 |
| 63 | the costs of 'being with the woman': secondary traumatic stress in midwifery89 | Leinweber, J | MIDWIFERY | 1.778 | 6.09 | Australia | 2010 |
| 64 | the role of the midwife in australia: views of women and midwives90 | Homer, CSE | MIDWIFERY | 1.778 | 5.58 | Australia | 2009 |
| 65 | utilization of research findings by graduate nurses and midwives91 | Veeramah, V | JOURNAL OF ADVANCED NURSING | 2.561 | 3.94 | England | 2004 |
| 66 | health care-seeking practices of pregnant women and the role of the midwife in cape town, south africa92 | Abrahams, N | JOURNAL OF MIDWIFERY & WOMENS HEALTH | 1.742 | 3.35 | South Africa | 2001 |
| 67 | comparison of midwife-led and consultant-led care of healthy women at low risk of childbirth complications in the republic of ireland: a randomised trial93 | Begley, C | BMC PREGNANCY AND CHILDBIRTH | 2.239 | 6.60 | Ireland | 2011 |
| 68 | evaluation of satisfaction with midwifery care94 | Harvey, S | MIDWIFERY | 1.778 | 3.47 | Canada | 2002 |
| 69 | work/life balance and health: the nurses and midwives e-cohort study95 | Schluter, PJ | INTERNATIONAL NURSING REVIEW | 2.034 | 6.50 | New Zealand | 2011 |
| 70 | nurse-midwives' attitudes towards adolescent sexual and reproductive health needs in kenya and zambia96 | Warenius, LU | REPRODUCTIVE HEALTH MATTERS | 1.662 | 4.33 | Sweden | 2006 |
| 71 | should obstetricians see women with normal pregnancies? a multicentre randomised controlled trial of routine antenatal care by general practitioners and midwives compared with shared care led by obstetricians97 | Tucker, JS | BRITISH MEDICAL JOURNAL | 30.223 | 2.60 | SCOTLAND | 1996 |
| 72 | Effects of continuity of care by a primary midwife (caseload midwifery) increases women's satisfaction with antenatal, intrapartum and postpartum care: results from the cosmos randomised controlled trial98 | Forster, DA | BMC PREGNANCY AND CHILDBIRTH | 2.239 | 12.80 | Australia | 2016 |
| 73 | shift work, nitrous oxide exposure, and spontaneous abortion among swedish midwives99 | Axelsson, G | OCCUPATIONAL AND ENVIRONMENTAL MEDICINE | 3.824 | 2.56 | SWEDEN | 1996 |
| 74 | understanding the social organisation of maternity care systems: midwifery as a touchstone100 | Benoit, C | SOCIOLOGY OF HEALTH & ILLNESS | 3.041 | 3.94 | Canada | 2005 |
| 75 | exposure to traumatic perinatal experiences and posttraumatic stress symptoms in midwives: prevalence and association with burnout101 | Sheen, K | INTERNATIONAL JOURNAL OF NURSING STUDIES | 3.783 | 10.33 | England | 2015 |
| 76 | burnout in swedish midwives102 | Hildingsson, I | SEXUAL & REPRODUCTIVE HEALTHCARE | 2.024 | 7.75 | Sweden | 2013 |
| 77 | the decline in maternal mortality in sweden: the role of community midwifery103 | Hogberg, U | AMERICAN JOURNAL OF PUBLIC HEALTH | 6.464 | 3.65 | Sweden | 2004 |
| 78 | the primacy of the good midwife in midwifery services: an evolving theory of professionalism in midwifery104 | Halldorsdottir, S | SCANDINAVIAN JOURNAL OF CARING SCIENCES | 2.34 | 6.10 | Iceland | 2011 |
| 79 | reclaiming birth, health, and community: midwifery in the inuit villages of nunavik, canada105 | Van Wagner, V | JOURNAL OF MIDWIFERY & WOMENS HEALTH | 1.742 | 4.36 | Canada | 2007 |
| 80 | a pilot study to investigate the effect of a simulation strategy on the clinical decision making of midwifery students106 | Cioffi, J | JOURNAL OF NURSING EDUCATION | 1.15 | 3.81 | Australia | 2005 |
| 81 | differences in episiotomy technique between midwives and doctors107 | Tincello, DG | BJOG-AN INTERNATIONAL JOURNAL OF OBSTETRICS AND GYNAECOLOGY | 4.663 | 3.39 | England | 2003 |
| 82 | midwifery in the netherlands - the wormerveer study - selection, mode of delivery, perinatal-mortality and infant morbidity108 | VANALTEN, D | BRITISH JOURNAL OF OBSTETRICS AND GYNAECOLOGY | 2.321 | 1.91 | NETHERLANDS | 1989 |
| 83 | obese women's experiences of encounters with midwives and physicians during pregnancy and child birth109 | Nyman, VMK | MIDWIFERY | 1.778 | 5.45 | Sweden | 2010 |
| 84 | cohort profile: the nurses and midwives e-cohort study - a novel electronic longitudinal study110 | Turner, C | INTERNATIONAL JOURNAL OF EPIDEMIOLOGY | 7.707 | 5.00 | Australia | 2009 |
| 85 | randomised controlled trial of home based motivational interviewing by midwives to help pregnant smokers quit or cut down111 | Tappin, DM | BMJ-BRITISH MEDICAL JOURNAL | 30.223 | 3.75 | Scotland | 2005 |
| 86 | an ethnographic study of women's experience of partnership caseload midwifery practice: the professional as a friend112 | Walsh, D | MIDWIFERY | 1.778 | 2.73 | England | 1999 |
| 87 | midwives' experiences of workplace resilience113 | Hunter, B | MIDWIFERY | 1.778 | 8.43 | Wales | 2014 |
| 88 | workplace aggression, including bullying in nursing and midwifery: a descriptive survey (the swab study)114 | Farrell, GA | INTERNATIONAL JOURNAL OF NURSING STUDIES | 3.783 | 6.56 | Australia | 2012 |
| 89 | the aceh besar midwives with mobile phones project: design and evaluation perspectives using the information and communication technologies for healthcare development model115 | Chib, A | JOURNAL OF COMPUTER-MEDIATED COMMUNICATION | 5.41 | 5.36 | Singapore | 2010 |
| 90 | use of complementary therapies in pregnancy: the perceptions of obstetricians and midwives in south australia116 | Gaffney, L | AUSTRALIAN & NEW ZEALAND JOURNAL OF OBSTETRICS & GYNAECOLOGY | 1.644 | 3.47 | Australia | 2004 |
| 91 | a mixed-methods study of secondary traumatic stress in certified nurse-midwives: shaken belief in the birth process117 | Beck, CT | JOURNAL OF MIDWIFERY & WOMENS HEALTH | 1.742 | 9.67 | USA | 2015 |
| 92 | occupational burnout and work factors in community and hospital midwives: a survey analysis118 | Yoshida, Y | MIDWIFERY | 1.778 | 7.25 | Haiti | 2013 |
| 93 | factors that contribute to midwives staying in midwifery: a study in one area health service in new south wales, australia119 | Sullivan, K | MIDWIFERY | 1.778 | 5.70 | Australia | 2011 |
| 94 | kaqchikel midwives, home births, and emergency obstetric referrals in guatemala: contextualizing the choice to stay at home120 | Berry, NS | SOCIAL SCIENCE & MEDICINE | 3.616 | 3.80 | USA | 2006 |
| 95 | midwives' visual interpretation of intrapartum cardiotocographs: intra- and inter-observer agreement121 | Devane, D | JOURNAL OF ADVANCED NURSING | 2.561 | 3.56 | Ireland | 2005 |
| 96 | pregnancy and labour in the dutch maternity care system: what is normal? the role division between midwives and obstetricians122 | Amelink-Verburg, MP | JOURNAL OF MIDWIFERY & WOMENS HEALTH | 1.742 | 5.09 | Netherlands | 2010 |
| 97 | the importance of reciprocity in relationships between community-based midwives and mothers123 | Hunter, B | MIDWIFERY | 1.778 | 3.73 | Wales | 2006 |
| 98 | supporting choice and control? communication and interaction between midwives and women at the antenatal booking visit124 | McCourt, C | SOCIAL SCIENCE & MEDICINE | 3.616 | 3.73 | England | 2006 |
| 99 | perinatal correlates of specific histological types of testicular cancer in patients below 35 years of age: a case-cohort study based on midwives' records in denmark125 | Sabroe, S | INTERNATIONAL JOURNAL OF CANCER | 5.145 | 2.43 | Denmark | 1998 |
| 100 | inter-observer variation in assessment of 845 labour admission tests: comparison between midwives and obstetricians in the clinical setting and two experts126 | Blix, E | BJOG-AN INTERNATIONAL JOURNAL OF OBSTETRICS AND GYNAECOLOGY | 4.663 | 3.06 |  | 2003 |

**Appendix A: Search strategies**

SCIE of ISI Web of science:

Mesh=nurse midwifery OR TS=nurse midwife* OR TS=nurse midwiv* OR TS=midwife* OR TS=midwiv*

32747 Results, after using the filters:

Data Bases: Web of Science Core Collection, Medline, BIOSIS Citation Index, SCIELO Citation Index

Languages: English

Period: 1985-2020
